# Supplementary material for: Investigation of the Effects of Infrared and Hot Air Oven Drying Methods on Drying Behaviour and Colour Parameters of Red Delicious Apple Slices
Source: MDPI journal article supplement (doi:10.3390/pr11103027), 2023-10-20
Supplement: s1 [file s1]

Article

# Investigation of the Effects of Infrared and Hot Air Oven Drying Methods on Drying Behaviour and Colour Parameters of Red Delicious Apple Slices

Oldřich Dajbých, Abraham Kabutey\*, Ľestmír Mizera and David Herák

Department of Mechanical Engineering, Faculty of Engineering, Czech University of Life Sciences Prague, 165 00 Prague, Czech Republic; dajbych@tf.czu.cz (O.D.); mizera@tf.czu.cz (Ľ.M.); herak@tf.czu.cz (D.H.)

\* Correspondence: kabutey@tf.czu.cz; Tel.: +420-22438-3180

**Citation:** Dajbých, O.; Kabutey, A.; Mizera, Ľ.; Herák, D. Investigation of the Effects of Infrared and Hot Air Oven Drying Methods on Drying Behaviour and Colour Parameters of Red Delicious Apple Slices. *Processes* **2023**, *11*, x. <https://doi.org/10.3390/xxxxx>

Academic Editors: Renata Różyło, César Ozuna, Sueli Rodrigues and Fabiano André Narciso Fernandes

Received: 4 September 2023

Revised: 14 October 2023

Accepted: 18 October 2023

Published: date

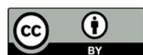

**Copyright:** © 2023 by the authors.

Submitted for possible open access

publication under the terms and conditions of the Creative Commons Attribution (CC BY) license (<https://creativecommons.org/licenses/by/4.0/>).

**Table S1.** Calculated parameters of sliced apple samples at drying temperatures of 60 °C using infra-red and hot air oven drying methods.

| Calculated parameters | Infrared drying at 60 °C |          |        | Hot air oven drying at 60 °C |          |        |
|-----------------------|--------------------------|----------|--------|------------------------------|----------|--------|
|                       | Mean                     | ± SD     | % CV   | Mean                         | ± SD     | % CV   |
| $L_O^*$               | 44.919                   | 5.607    | 12.482 | 49.247                       | 3.016    | 6.124  |
| $L^*$                 | 9.017                    | 0.274    | 3.043  | 18.873                       | 8.419    | 44.608 |
| $a_O^*$               | 3.231                    | 2.930    | 90.684 | 4.217                        | 0.628    | 14.890 |
| $a^*$                 | 8.019                    | 1.378    | 17.187 | 4.952                        | 3.477    | 70.218 |
| $b_O^*$               | 25.926                   | 1.525    | 5.883  | 29.046                       | 1.020    | 3.510  |
| $b^*$                 | 9.081                    | 0.764    | 8.418  | 16.139                       | 7.571    | 46.913 |
| $\Delta E$            | 40.094                   | 5.461    | 13.620 | 33.190                       | 13.742   | 41.404 |
| $\Delta C$            | 17.781                   | 0.439    | 2.470  | 13.195                       | 8.246    | 62.493 |
| $CI$                  | 99.419                   | 28.190   | 28.354 | 15.890                       | 2.831    | 17.815 |
| $WI$                  | 8.207                    | 0.317    | 3.859  | 16.842                       | 6.537    | 38.814 |
| $BI$                  | 261.534                  | 13.241   | 5.063  | 170.187                      | 12.261   | 7.204  |
| $Hue^\circ$           | 48.655                   | 7.262    | 14.926 | 73.981                       | 4.248    | 5.742  |
| $RR$                  | 1.800                    | 0.176    | 9.774  | 1.854                        | 0.004    | 0.209  |
| $SK$                  | 50.217                   | 7.511    | 14.958 | 53.208                       | 3.171    | 5.959  |
| $\rho_{bulk}$         | 0.278                    | 0.007    | 2.576  | 0.341                        | 0.004    | 1.311  |
| $A_O$                 | 8527.401                 | 1474.838 | 17.295 | 8257.497                     | 1016.338 | 12.308 |
| $A_f$                 | 5580.508                 | 412.432  | 7.391  | 6150.002                     | 21.085   | 0.343  |
| $V_O$                 | 27.309                   | 4.734    | 17.337 | 26.912                       | 3.210    | 11.928 |
| $V_f$                 | 13.417                   | 0.306    | 2.279  | 12.542                       | 0.649    | 5.172  |

**Table S2.** Calculated parameters of sliced apple samples at drying temperatures of 50 °C using infra-red and hot air oven drying methods.

| Calculated parameters | Infrared drying at 50 °C |       |        | Hot air oven drying at 50 °C |        |        |
|-----------------------|--------------------------|-------|--------|------------------------------|--------|--------|
|                       | Mean                     | ± SD  | % CV   | Mean                         | ± SD   | % CV   |
| $L_O^*$               | 40.409                   | 0.380 | 0.941  | 48.844                       | 3.804  | 7.787  |
| $L^*$                 | 14.764                   | 7.226 | 48.945 | 23.173                       | 16.651 | 71.855 |
| $a_O^*$               | 4.511                    | 1.541 | 34.160 | 3.925                        | 3.784  | 96.419 |
| $a^*$                 | 6.963                    | 1.932 | 27.744 | 6.543                        | 3.693  | 56.435 |
| $b_O^*$               | 27.336                   | 1.344 | 4.915  | 31.155                       | 0.600  | 1.925  |
| $b^*$                 | 13.769                   | 5.975 | 43.395 | 19.732                       | 11.261 | 57.070 |
| $\Delta E$            | 29.131                   | 8.820 | 30.278 | 28.363                       | 23.298 | 82.142 |
| $\Delta C$            | 13.815                   | 4.479 | 32.420 | 11.979                       | 11.330 | 94.578 |

|                         |          |         |        |          |         |        |
|-------------------------|----------|---------|--------|----------|---------|--------|
| <i>CI</i>               | 42.019   | 26.484  | 63.029 | 19.384   | 14.037  | 72.417 |
| <i>WI</i>               | 13.218   | 5.994   | 45.350 | 19.621   | 12.850  | 65.493 |
| <i>BI</i>               | 219.863  | 28.058  | 12.761 | 199.685  | 64.805  | 32.454 |
| <i>Hue</i> <sup>°</sup> | 62.386   | 3.925   | 6.292  | 71.617   | 0.130   | 0.181  |
| <i>RR</i>               | 1.960    | 0.229   | 11.663 | 1.612    | 0.050   | 3.073  |
| <i>SK</i>               | 50.783   | 2.391   | 4.708  | 57.801   | 0.469   | 0.811  |
| $\rho_{bulk}$           | 0.252    | 0.015   | 6.044  | 0.431    | 0.053   | 12.205 |
| $A_o$                   | 9231.358 | 891.892 | 9.662  | 8735.040 | 432.605 | 4.953  |
| $A_f$                   | 6357.969 | 574.525 | 9.036  | 5766.349 | 2.505   | 0.043  |
| $V_o$                   | 30.038   | 2.406   | 8.009  | 27.319   | 2.211   | 8.092  |
| $V_f$                   | 14.755   | 0.466   | 3.157  | 11.524   | 0.804   | 6.979  |

**Table S3.** Calculated parameters of sliced apple samples at drying temperatures of 40 °C using infra-red and hot air oven drying methods.

| Calculated parameters   | Infrared drying at 40 °C |         |        | Hot air oven drying at 40 °C |          |        |
|-------------------------|--------------------------|---------|--------|------------------------------|----------|--------|
|                         | Mean                     | ± SD    | % CV   | Mean                         | ± SD     | % CV   |
| $L_o^*$                 | 39.427                   | 6.756   | 17.137 | 34.501                       | 9.096    | 26.365 |
| $L^*$                   | 29.017                   | 2.450   | 8.444  | 19.156                       | 7.958    | 41.542 |
| $a_o^*$                 | 8.664                    | 5.791   | 66.842 | 6.356                        | 5.312    | 83.589 |
| $a^*$                   | 10.242                   | 5.718   | 55.826 | 2.290                        | 0.511    | 22.330 |
| $b_o^*$                 | 30.056                   | 8.912   | 29.653 | 24.370                       | 2.199    | 9.024  |
| $b^*$                   | 25.680                   | 3.090   | 12.033 | 15.995                       | 6.785    | 42.419 |
| $\Delta E$              | 16.746                   | 7.776   | 46.433 | 19.759                       | 16.065   | 81.306 |
| $\Delta C$              | 12.494                   | 2.750   | 22.010 | 11.237                       | 4.959    | 44.134 |
| <i>CI</i>               | 13.171                   | 4.951   | 37.592 | 8.936                        | 5.362    | 59.998 |
| <i>WI</i>               | 23.665                   | 0.472   | 1.993  | 17.351                       | 6.457    | 37.212 |
| <i>BI</i>               | 187.726                  | 21.671  | 11.544 | 155.945                      | 0.578    | 0.371  |
| <i>Hue</i> <sup>°</sup> | 69.039                   | 8.741   | 12.660 | 81.482                       | 1.771    | 2.173  |
| <i>RR</i>               | 1.332                    | 0.297   | 22.274 | 1.464                        | 0.034    | 2.307  |
| <i>SK</i>               | 49.758                   | 0.262   | 0.527  | 50.210                       | 3.531    | 7.033  |
| $\rho_{bulk}$           | 0.446                    | 0.086   | 19.307 | 0.461                        | 0.038    | 8.250  |
| $A_o$                   | 7508.338                 | 953.772 | 12.703 | 8073.453                     | 1149.395 | 14.237 |
| $A_f$                   | 5162.863                 | 502.047 | 9.724  | 5707.057                     | 1528.085 | 26.775 |
| $V_o$                   | 23.898                   | 3.112   | 13.023 | 24.862                       | 4.264    | 17.152 |
| $V_f$                   | 12.002                   | 1.501   | 12.506 | 12.454                       | 3.001    | 24.098 |

CV: Coefficient of variation;  $\pm$ SD: Standard deviation;  $L_o^*$ ,  $a_o^*$  and  $b_o^*$  represent fresh samples and  $L^*$ ,  $a^*$  and  $b^*$  represent dried samples as lightness, greenness/redness and blueness/yellowness; total colour difference ( $\Delta E$ ), chroma ( $\Delta C$ ), colour index (*CI*), whiteness index (*WI*), browning index (*BI*); Hue angle (*Hue*<sup>°</sup>); rehydration capacity *RR* (-); shrinkage *S* (%) and bulk density  $\rho_{bulk}$  (g/mL);  $A_o$ : initial area of the fresh sample (mm<sup>2</sup>);  $A_f$ : final area of the dried sample (mm<sup>2</sup>);  $V_o$  is the initial volume of the fresh sample (mL) and  $V_f$  is the final volume of the dried sample (mL).

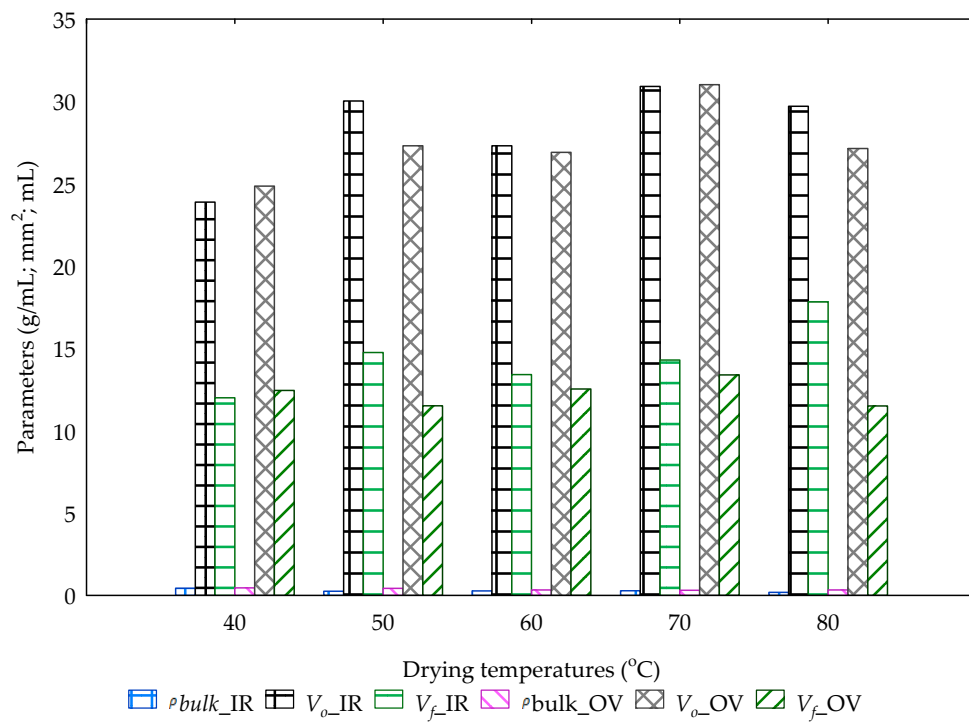

**Figure S1.** Column plots of bulk density  $\rho_{bulk}$  (g/mL);  $V_o$  the initial volume of fresh sample (mL) and  $V_f$  the final volume of the dried sample (mL) under infrared IR and hot air oven OV drying temperatures.

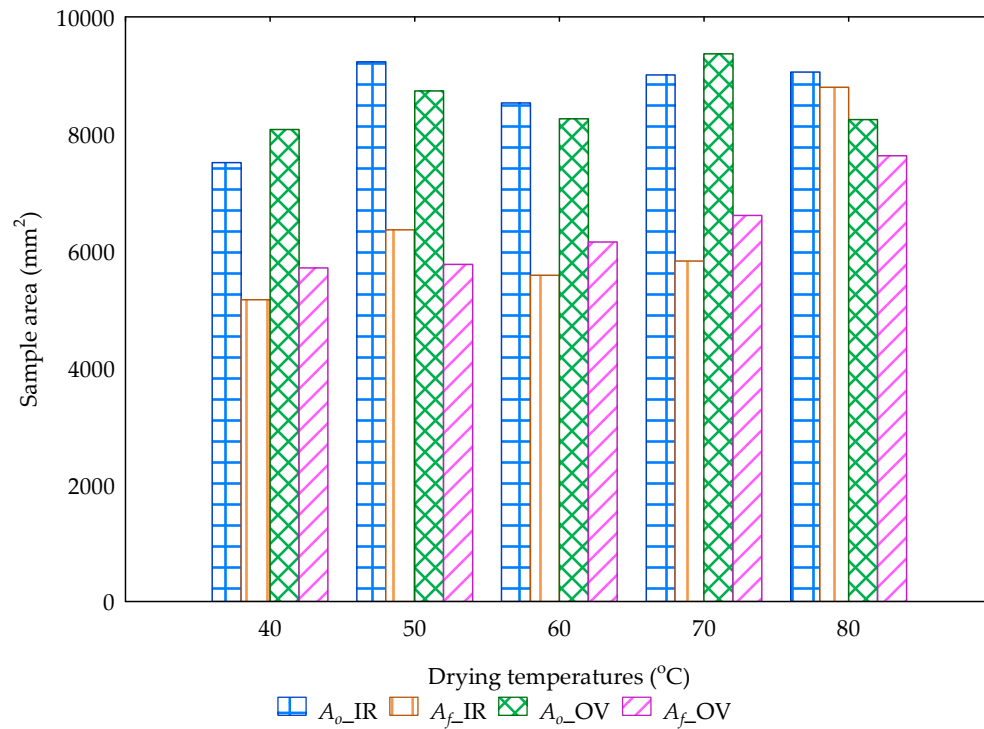

**Figure S2.** Column plots of  $A_o$ : initial area of the fresh sample ( $\text{mm}^2$ );  $A_f$ : final area of the dried sample ( $\text{mm}^2$ );  $V_o$ : initial volume of the fresh sample (mL) and  $V_f$ : final volume of the dried sample (mL) under infrared IR and hot air oven OV drying temperatures.

**Table S4a.** Fitting parameter values and statistical validation metrics for drying sliced apple samples at different temperatures using infrared, IR and oven, OV drying methods.

| Model Name   | $T_p$ (°C) | Drying Methods | Model coefficients/constants |          |           | RMSE     | $(\chi^2)$ | $R^2$    | EF       |
|--------------|------------|----------------|------------------------------|----------|-----------|----------|------------|----------|----------|
| Page*        | 60**       | IR*            | $k$                          | $n$      |           | 0.084011 | 0.000065   | 0.999126 | 0.999702 |
|              |            | OV*            | 0.005928                     | 1.083787 |           | 0.138564 | 0.000445   | 0.995696 | 0.99923  |
| Logarithmic* | 60**       | IR*            | $a$                          | $k$      | $c$       | 0.073777 | 0.000043   | 0.999336 | 1        |
|              |            | OV*            | 1.038304                     | 0.008769 | -0.01621  | 0.115932 | 0.00025    | 0.997182 | 1        |
| Page*        | 50**       | IR*            | $k$                          | $n$      |           | 0.084576 | 0.000071   | 0.999096 | 0.999843 |
|              |            | OV*            | 0.003812                     | 1.123638 |           | 0.163496 | 0.000899   | 0.991821 | 0.998679 |
| Logarithmic* | 50**       | IR*            | $a$                          | $k$      | $c$       | 0.071404 | 0.000043   | 0.999410 | 1        |
|              |            | OV*            | 1.170587                     | 0.004181 | -0.135136 | 0.114454 | 0.000291   | 0.996941 | 1        |
| Page*        | 40**       | IR*            | $k$                          | $n$      |           | 0.123973 | 0.000348   | 0.995870 | 0.999824 |
|              |            | OV*            | 0.001487                     | 1.188984 |           | 0.134016 | 0.000458   | 0.994936 | 0.999788 |

|              |      |     |          |          |           |          |          |          |   |
|--------------|------|-----|----------|----------|-----------|----------|----------|----------|---|
| Logarithmic* | 40** | IR* | <i>a</i> | <i>k</i> | <i>c</i>  | 0.039973 | 0.000004 | 0.999946 | 1 |
|              |      | OV* | 1.176722 | 0.003154 | −0.170748 | 0.046249 | 0.000008 | 0.999900 | 1 |

\*: See model description in Table 1; \*\*: Experiment 2 dataset;  $T_p$ : Drying temperature; RMSE: Root mean square error; ( $\chi^2$ ): chi-square;  $R^2$ : Coefficient of determination and EF: Modelling efficiency.

**Table S4b.** Weibull distribution model fitting parameter values for drying sliced apple samples at 70 °C and 80 °C drying temperatures using infrared, IR and oven, OV drying methods.

| Model Name           | $T_p$ (°C) | Drying Methods | Model coefficients/constants |          |          |          |
|----------------------|------------|----------------|------------------------------|----------|----------|----------|
|                      |            |                | <i>k</i>                     | <i>a</i> | <i>b</i> | <i>n</i> |
| Weibull distribution | 60**       | IR*            | 0.006869                     | −0.01164 | −1.01449 | 1.047945 |
|                      |            | OV*            | 0.001297                     | −0.05941 | −1.03452 | 1.228486 |
|                      | 50**       | IR*            | 0.005156                     | −0.01781 | −1.03181 | 1.058412 |
|                      |            | OV*            | 0.000867                     | −0.1146  | −1.08942 | 1.241478 |
|                      | 40**       | IR*            | 0.003684                     | −0.19841 | −1.21286 | 0.966903 |
|                      |            | OV*            | 0.001908                     | −0.26046 | −1.26516 | 1.049672 |

**Table S4c.** Statistical validation metrics for Weibull distribution model.

| Model Name           | $T_p$ (°C) | Drying Methods | Statistical metrics |              |          |    |
|----------------------|------------|----------------|---------------------|--------------|----------|----|
|                      |            |                | RMSE                | ( $\chi^2$ ) | $R^2$    | EF |
| Weibull distribution | 60**       | IR*            | 0.071435            | 0.000033     | 0.999483 | 1  |
|                      |            | OV*            | 0.092937            | 0.0001       | 0.998881 | 1  |
|                      | 50**       | IR*            | 0.067762            | 0.000029     | 0.999605 | 1  |
|                      |            | OV*            | 0.098497            | 0.000144     | 0.998487 | 1  |
|                      | 40**       | IR*            | 0.029402            | 0.000002     | 0.999977 | 1  |
|                      |            | OV*            | 0.039762            | 0.000004     | 0.999954 | 1  |

\*: See model description in Table 1; \*\*: Experiment 2 dataset;  $T_p$ : Drying temperature; RMSE: Root mean square error; ( $\chi^2$ ): chi-square;  $R^2$ : Coefficient of determination and EF: Modelling efficiency.

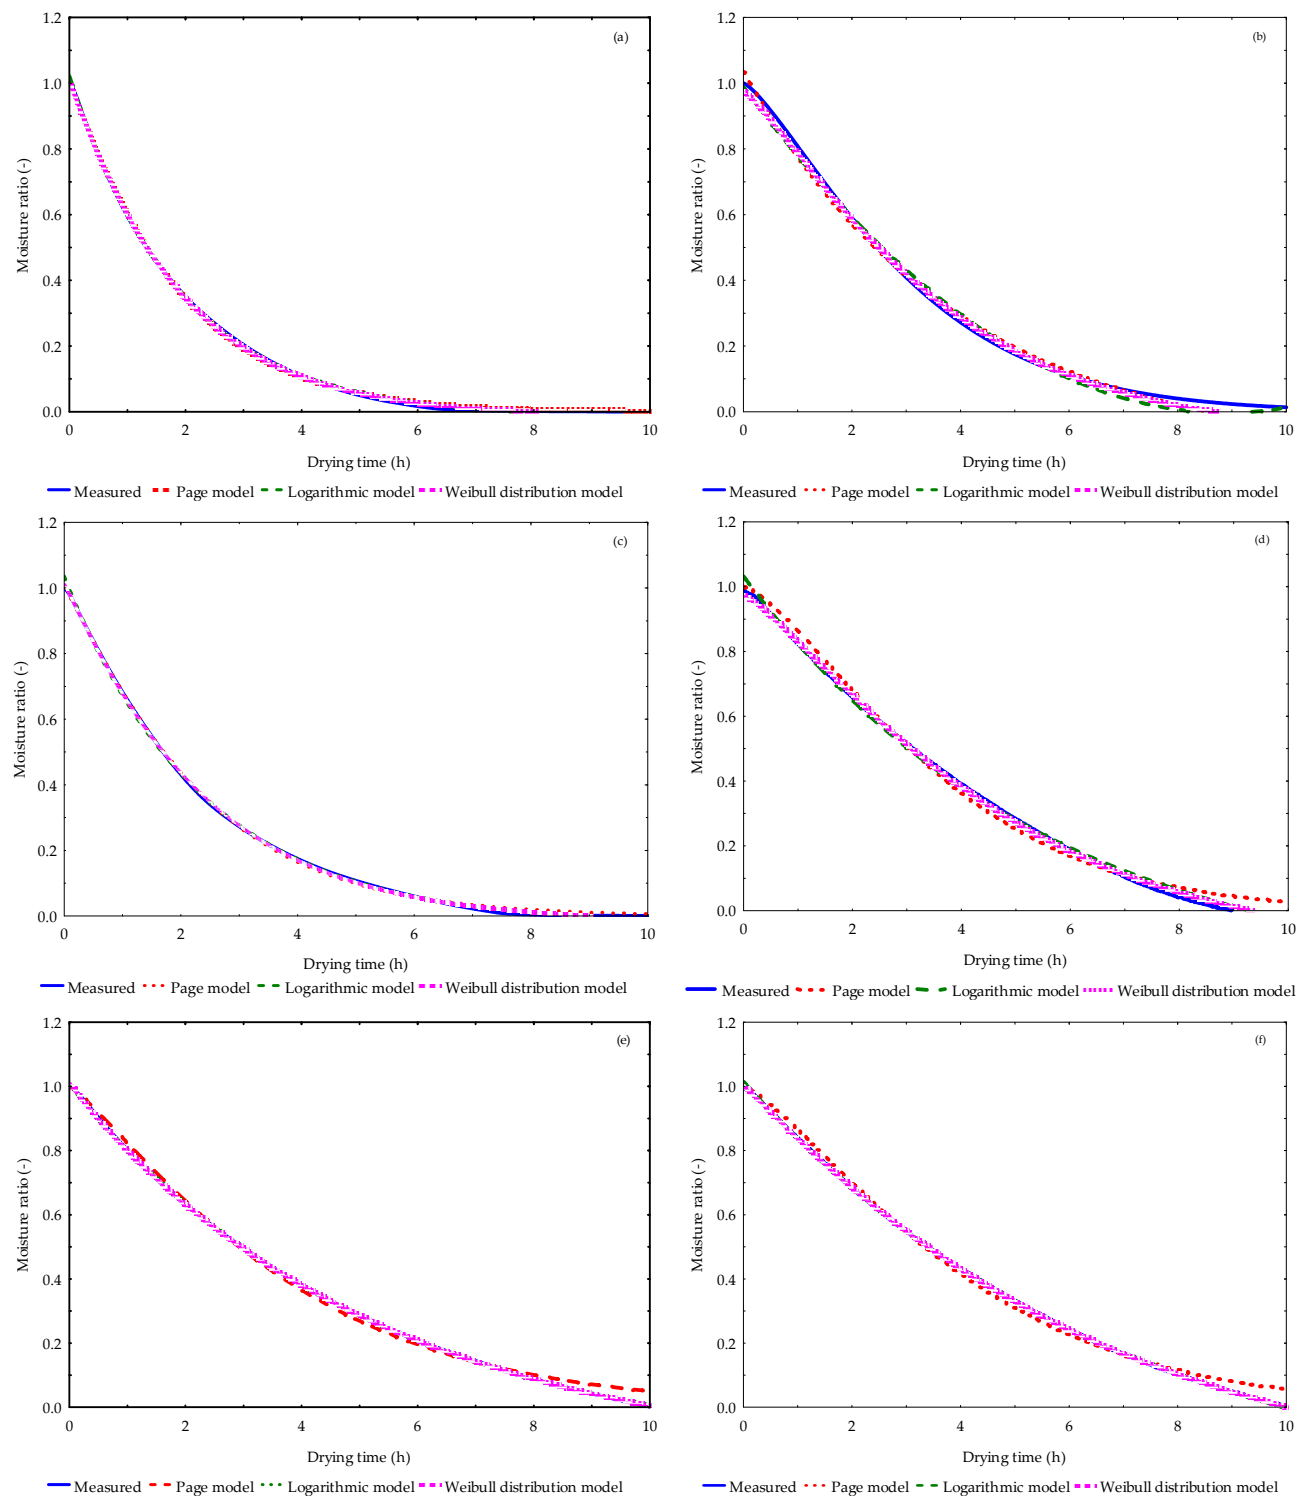

**Figure S3.** Measured and fitted curves of dried apple sliced samples under (a) infrared and (b) hot air oven drying at 60 °C, (c) infrared and (d) hot air oven drying at 50 °C, and (e) infrared and (f) hot air oven drying at 40 °C.

**Table S5.** ANOVA univariate results of calculated parameters of sliced apple samples under the effect of infrared drying temperatures.

| Effect               | df | Sum of squares | Mean sum of squares | F-value | p-value |
|----------------------|----|----------------|---------------------|---------|---------|
| Infrared drying      |    |                |                     |         |         |
| <i>L*</i>            |    |                |                     |         |         |
| Temperature °C       | 4  | 753.177        | 188.294             | 8.82632 | < 0.05  |
| Error                | 5  | 106.666        | 21.333              |         |         |
| Total                | 9  | 859.843        |                     |         |         |
| $\Delta E$           |    |                |                     |         |         |
| Temperature °C       | 4  | 1115.68        | 278.92              | 6.1785  | < 0.05  |
| Error                | 5  | 225.72         | 45.14               |         |         |
| Total                | 9  | 1341.40        |                     |         |         |
| <i>CI</i>            |    |                |                     |         |         |
| Temperature °C       | 4  | 63084.65       | 15771.16            | 5.49888 | < 0.05  |
| Error                | 5  | 14340.34       | 2868.07             |         |         |
| Total                | 9  | 77424.99       |                     |         |         |
| <i>WI</i>            |    |                |                     |         |         |
| Temperature °C       | 4  | 474.147        | 118.537             | 9.917   | < 0.05  |
| Error                | 5  | 59.766         | 11.953              |         |         |
| Total                | 9  | 533.913        |                     |         |         |
| $\rho_{bulk}$        |    |                |                     |         |         |
| Temperature °C       | 4  | 0.073253       | 0.018313            | 10.8270 | < 0.05  |
| Error                | 5  | 0.008457       | 0.001691            |         |         |
| Total                | 9  | 0.081710       |                     |         |         |
| <i>A<sub>f</sub></i> |    |                |                     |         |         |
| Temperature °C       | 4  | 16518131       | 4129533             | 10.586  | < 0.05  |
| Error                | 5  | 1950397        | 390079              |         |         |
| Total                | 9  | 18468529       |                     |         |         |
| <i>V<sub>f</sub></i> |    |                |                     |         |         |
| Temperature °C       | 4  | 37.129         | 9.282               | 6.841   | < 0.05  |
| Error                | 5  | 6.784          | 1.357               |         |         |
| Total                | 9  | 43.914         |                     |         |         |

df: Degrees of freedom; *p*-value < 0.05 means significant; *L\**: Lightness of dried sample; total color difference ( $\Delta E$ ); colour index (*CI*); whiteness index (*WI*);  $\rho_{bulk}$ : bulk density (g/mL); *A<sub>f</sub>*: final area of the dried sample (mm<sup>2</sup>); *V<sub>f</sub>* is the final volume of the dried sample (mL).



**Table S6.** ANOVA univariate results of calculated parameters of sliced apple samples under the effect of hot air oven drying temperatures.

| Effect                  | df | Sum of squares | Mean sum of squares | F-value | p-value |
|-------------------------|----|----------------|---------------------|---------|---------|
| Hot air oven drying     |    |                |                     |         |         |
| <i>Hue</i> <sup>°</sup> |    |                |                     |         |         |
| Temperature °C          | 4  | 212.30         | 53.08               | 8.973   | < 0.05  |
| Error                   | 5  | 29.57          | 5.91                |         |         |
| Total                   | 9  | 241.88         |                     |         |         |
| <i>RR</i>               |    |                |                     |         |         |
| Temperature °C          | 4  | 0.41609        | 0.10402             | 8.821   | < 0.05  |
| Error                   | 5  | 0.05897        | 0.01179             |         |         |
| Total                   | 9  | 0.47506        |                     |         |         |
| <i>ρ<sub>bulk</sub></i> |    |                |                     |         |         |
| Temperature °C          | 4  | 0.033177       | 0.008294            | 8.640   | < 0.05  |
| Error                   | 5  | 0.004800       | 0.000960            |         |         |
| Total                   | 9  | 0.037977       |                     |         |         |

df: Degrees of freedom; *p*-value < 0.05 means significant; hue angle (*Hue*<sup>°</sup>); rehydration ratio, *RR* (-) and *ρ<sub>bulk</sub>*: bulk density (g/mL).
